# 1 Interdisciplinary Inquiry via PanelGPT: Application to Explore Chatbot Application in Sports Rehabilitation

2  
3 Joseph C. McBee<sup>1,2</sup>, Daniel Y. Han<sup>1</sup>, Li Liu<sup>3,4</sup>, Leah Ma<sup>5</sup>, Donald A. Adjeroh<sup>6</sup>, Dong Xu<sup>7</sup>, Gangqing Hu<sup>1,\*</sup>

4 <sup>1</sup>Department of Microbiology, Immunology & Cell Biology, West Virginia University, Morgantown, WV 26506,  
5 USA

6 <sup>2</sup>Department of Chemical and Biomedical Engineering, West Virginia University, Morgantown, WV 26506, USA

7 <sup>3</sup>College of Health Solutions, Arizona State University, Phoenix, AZ 85004, USA

8 <sup>4</sup>Biodesign Institute, Arizona State University, Tempe, AZ, 85281 USA

9 <sup>5</sup>College of Health, Education, and Human Services, Wright State University, Dayton, OH 45345, USA

10 <sup>6</sup>Lane Department of Computer Science & Electrical Engineering, West Virginia University, Morgantown, WV  
11 26506, USA

12 <sup>7</sup>Department of Electrical Engineer and Computer Science, Christopher S. Bond Life Sciences Center, University of  
13 Missouri, Columbia, MO65211, USA

14 \*Corresponding author: [michael.hu@hsc.wvu.edu](mailto:michael.hu@hsc.wvu.edu)

## 15 Abstract

16 *Background:* ChatGPT showcases exceptional conversational capabilities and extensive cross-disciplinary  
17 knowledge. In addition, it possesses the ability to perform multiple roles within a single chat session. This unique  
18 multi-role-playing feature positions ChatGPT as a promising tool to explore interdisciplinary subjects.

19 *Objective:* The study intended to guide ChatGPT for interdisciplinary exploration through simulated panel  
20 discussions. As a proof-of-concept, we employed this method to evaluate the advantages and challenges of using  
21 chatbots in sports rehabilitation.

22 *Methods:* We proposed a model termed PanelGPT to explore ChatGPTs' knowledge graph on interdisciplinary  
23 topics through simulated panel discussions. Applied to "chatbots in sports rehabilitation", ChatGPT role-played both  
24 the moderator and panelists, which included a physiotherapist, psychologist, nutritionist, AI expert, and an athlete.  
25 We act as the audience posed questions to the panel, with ChatGPT acting as both the panelists for responses and the  
26 moderator for hosting the discussion. We performed the simulation using the ChatGPT-4 model and evaluated the  
27 responses with existing literature and human expertise.

28 *Results:* Each simulation mimicked a real-life panel discussion: The moderator introduced the panel and posed  
29 opening/closing questions, to which all panelists responded. The experts engaged with each other to address  
30 inquiries from the audience, primarily from their respective fields of expertise. By tackling questions related to  
31 education, physiotherapy, physiology, nutrition, and ethical consideration, the discussion highlighted benefits such  
32 as 24/7 support, personalized advice, automated tracking, and reminders. It also emphasized the importance of user  
33 education and identified challenges such as limited interaction modes, inaccuracies in emotion-related advice,  
34 assurance on data privacy and security, transparency in data handling, and fairness in model training. The panelists  
35 reached a consensus that chatbots are designed to assist, not replace, human healthcare professionals in the  
36 rehabilitation process.

37 *Conclusions:* Compared to a typical conversation with ChatGPT, the multi-perspective approach of PanelGPT  
38 facilitates a comprehensive understanding of an interdisciplinary topic by integrating insights from experts with  
39 complementary knowledge. Beyond addressing the exemplified topic of chatbots in sports rehabilitation, the model  
40 can be adapted to tackle a wide array of interdisciplinary topics within educational, research, and healthcare settings.

41 **Keywords:** ChatGPT; chatbots; multi-role-playing; interdisciplinary inquiry; sports medicine

## 42 Introduction

43 The sports industry, a significant economic contributor in the U.S., is projected to generate \$83.1 billion of revenue  
44 in 2023 <sup>1</sup>. Concurrently, sports/recreation-related injuries are prevalent, with an estimated rate of 34 per 1000  
45 individuals, which accumulates to an annual total of 8.6 million cases <sup>2</sup>. Sports rehabilitation, aiming to facilitate full  
46 recovery, minimize sports downtime, and prevent future injuries, results from a coordinated effort between the

47 athlete and healthcare professionals across various disciplines <sup>3</sup>. However, the rehabilitation process often spans  
48 over a lengthy period and demands expensive medical and psychological support, making it inaccessible for many  
49 patients. In recent year, the integration of artificial intelligence (AI) in sports medicine have shown promise in  
50 enhancing both the accessibility to service and efficacy of treatment outcomes <sup>4</sup>. However, the use of chatbots in  
51 assisting sports rehabilitation is still in its formative stages, with many of the potential benefits and pitfalls yet to be  
52 explored and understood.

53 ChatGPT, a sophisticated large language model (LLM)-based chatbot, is capable of human-like dialogues <sup>5</sup>. Trained  
54 on a vast dataset spanning a wide range of disciplines, ChatGPT has an attractive feature: multi-role-playing, which  
55 allows the chatbot to assume the roles of several discipline-specific experts at the same time. This unique feature  
56 inspired us to propose a model for exploring interdisciplinary topics through a simulated panel discussion, where  
57 ChatGPT assumes the roles of a moderator and various experts on the panel. We employed this model to navigate  
58 the multifaceted interdisciplinary landscape of chatbot-assisted sports rehabilitation and summarized our findings.

## 59 **Methods**

60 We proposed a model (named as PanelGPT) to explore interdisciplinary topics through a simulated panel discussion  
61 powered by ChatGPT (**Figure 1A**). In this model, ChatGPT assumes the roles of both the moderator and panel  
62 experts at varying times, while a human operator, representing people/humans in the audience, poses questions and  
63 sends reminders to the moderator or the panelists. Questions from the human operator are directly copied and pasted  
64 into the chat session, with ChatGPT determining which panel member(s) should respond. If the discussion stalls at  
65 any point, the human operator prompt the moderator or panelists to continue by sending reminders. After each round  
66 of discussion, the moderator summarizes the comments before moving to solicit the next question from the  
67 audience. Upon conclusion of the panel discussion, the chatbot's responses and suggestions are summarized and  
68 evaluated through the literature or human expert opinions.

69 As an illustrative example, we applied PanelGPT to explore the use of chatbots in sports rehabilitation. The  
70 simulated panel comprised four experts representing essential disciplines related to the topic: a physiotherapist, a  
71 psychologist, a nutritionist, and an AI expert specializing in clinical applications. In addition, a virtual athlete who  
72 had successfully recovered from a severe injury participated in the panel. Initially, we formulated four main  
73 questions based on personal experience and literature review. After reviewing the responses from pilot simulations,  
74 we added two more questions (**Table 1**). During one of the pilot simulations, ChatGPT autonomously introduced  
75 opening questions, which we subsequently included in the final simulations. This finding also prompted us to  
76 instruct the chatbot to ask concluding questions at the end of each simulation.

77 To avoid misunderstanding, our focus is not on the use of ChatGPT to provide sports rehabilitation advice. Instead,  
78 we centered on the use of ChatGPT to drive a panel discussion entitled “chatbots in sports rehabilitation”. The  
79 prompts used to steer the final simulations are detailed in **Table 2**. A flow chart that outlines the process of the  
80 simulation is shown in **Figure 1B**. Initially, we instructed ChatGPT to undertake multiple roles and specified other  
81 settings in the simulation (**Table 2**). The moderator was initially prompted to introduce the panelists and kickoff the  
82 discussion with opening questions. Following the responses to these initial questions from the panelists, the  
83 moderator was then tasked to summarize the responses and then open the platform for questions from the audience.  
84 In response to this, the human operator copied each audience question directly into the chat session, allowing  
85 ChatGPT to autonomously select which expert should respond. After each round of questions and answers, the  
86 moderator was prompted to summarize the responses and then call for the next question. This process iterated until  
87 all audience questions had been addressed. Finally, at the conclusion of the panel discussion, the moderator was  
88 asked to propose a closing question and provide a summary of the responses. Additional prompts were introduced as  
89 needed to ensure the smooth progression of the panel discussion (**Table 2**). We repeated the simulation three times  
90 using ChatGPT-4 (May 24 version).

## 91 **Results**

92 The prompts used in the simulated panel discussion and the corresponding scripts are accessible in **Supplementary**  
93 **Files 1 to 3** (audio version available upon request). As expected, two or more experts responded to each question.  
94 The experts generally offered insights from the standpoint of their respective fields of expertise (**Table 3**). We  
95 evaluated the responses and added references when necessary for clarification. Major findings were compiled and  
96 summarized below.

97 *Opening Question:* The simulated panel discussion began with introductions and requests for the panelists'  
98 perspectives on the role of chatbots in sports rehabilitation, to which all panel members provided responses (**Table**  
99 **3**). The ensuing dialogue identified chatbots as round-the-clock support systems, adept at monitoring, offering  
100 reminders, consulting, and nurturing a positive mindset in athletes during their recovery. Similar observations are  
101 reported for orthopedic patients <sup>6-8</sup>. Looking into the future and consistent with expectations, it was suggested that  
102 chatbots might grow increasingly adept at analyzing biomechanical data, emotional indicators, and nutritional needs,  
103 thus providing personalized feedback that helps athletes better comprehend their bodies and healing journeys.

104 *Patient Education:* The conversation pinpointed several key factors in educating athletes on the use of chatbots for  
105 rehabilitation. Both the athlete and the psychologist touched the importance of understanding the benefits of using a  
106 chatbot, such as serving as a readily available source for advice and mental support <sup>9</sup>. The AI expert emphasized on  
107 educating transparency: how data is collected, processed, stored, and protected. Effective communication with a  
108 Chatbot is a non-trivial task <sup>10</sup>. The physiotherapist focused on guiding users on how to effectively interact with the  
109 chatbot for the most useful responses, and how to interpret the responses. The discussion also underscored that the  
110 chatbot system is designed to enhance recovery, not to replace human touch. Through education, athletes need to be  
111 able to identify situations that call for direct communication with healthcare professionals.

112 *Physical Therapy:* The primary focus of the questions was on the chatbot's potential in facilitating physical therapy  
113 by analyzing movements and weight distributions <sup>11</sup>. Relevant responses were from the physiotherapist and the AI  
114 expert, who both acknowledged that current chatbots primarily interact with users through text and voice, which  
115 restricts their direct applicability to the question. Yet, the AI expert envisioned the possibility of integrating  
116 chatbots, wearables, cameras, and smart devices to analyze an athlete's movement patterns and providing real-time,  
117 personalized feedback. A good example as we noticed in the literature is computer vision-based analysis that has  
118 been applied to monitor and improve sports performance <sup>12</sup>. The AI expert further highlighted that the accuracy of  
119 this application depends on the size and quality of the training data, as well as advances in AI technologies like  
120 machine learning and computer vision.

121 *Psychological Support:* This round of discussion explored the role of chatbots in analyzing emotional cues via  
122 sentiment analysis, a technique previously shown to enhance patient satisfaction in several medical chatbot  
123 applications <sup>13-15</sup> and other applications <sup>16</sup>. The panel's responses aligned with the existing literature: by delivering  
124 tailored responses to emotions, the chatbots offer athletes with emotional support and reduce their feelings of being  
125 isolated. Nevertheless, the panel did not explore the impact of chatbots on psychological outcome measures, such as  
126 improvements in communication skills, cognitive level, motivation, and abilities in coping with the injury. Both the  
127 psychologist and the AI expert cautioned that sentiment analysis may not always capture human emotions  
128 accurately. Thus, psychological support provided via chatbots should be regarded as a complement to human  
129 interventions, which in our opinion can extend from healthcare professionals to coaches, teammates, friends, and  
130 family members.

131 *Nutrition:* Chatbots have been used for nutrition advice <sup>17-19</sup>. The nutritionist outlined multiple roles for chatbots in  
132 nutritional management, such as reminding athletes to stay hydrated, tracking dietary intake, and suggesting meal  
133 plans. A personalized dietary plan could employ an advanced AI algorithm to analyze factors like demographics,  
134 injury type, recovery stage, and allergy history, as well as signals from wearable devices and health tracking apps.  
135 The AI expert emphasized that building a personalized nutrition model demands a precise understanding of  
136 nutritional science and human physiology, as well as high-quality training data. However, given that chatbots might

137 make mistakes such as recommending diets containing allergens<sup>20</sup> or harmful diet tips that promote eating disorders  
138<sup>21</sup>, they should be regarded as supplementary tools to human nutritionists rather than as their replacements.

139 *Tracking and Other Alternatives:* Responses from the physiotherapist and the AI expert largely echoed those  
140 provided during the physical therapy round. The athlete noted that the automated tracking, recording, and reminding  
141 function helps reduce stress, echoing the psychologist's comments. In line with remarks made by other researchers  
142<sup>22</sup>, the simulation highlighted several advantages of chatbots over traditional methods. These included reducing the  
143 need for manual reporting, offering convenient cloud-based access to records, real-time data collection,  
144 instantaneous analysis, and providing immediate advice. Despite these benefits, the simulation lacked a discussion  
145 on how chatbots could potentially enhance treatment outcomes over alternatives, such as increasing patient  
146 satisfaction or reducing recovery duration. In addition, the questions were designed to invoke engagements from all  
147 panel members. However, the nutritionist unexpectedly did not respond (**Table 3**).

148 *Ethics:* Distinct from other audience-initiated topics, questions regarding ethics prompted responses from all  
149 panelists (**Table 3**). Some comments reiterated points from previous discussions, particularly regarding patient  
150 education. The conversation emphasized the crucial need for stringent adherence to medical privacy regulations such  
151 as HIPAA in the U.S. and GDPR in Europe. It highlighted the necessity of robust protocols for data encryption and  
152 storage to ensure security, as well as the needs for transparency on data collection, processing, and accessibility.  
153 However, the panel didn't delve into the merits and drawbacks of open-source, locally deployed chatbots (especially  
154 those furnished with domain-specific knowledge) versus commercial and online chatbots with regards to privacy  
155 and security<sup>23</sup>. Regarding bias and fairness, it was stressed that chatbot training should utilize diverse and  
156 representative datasets. As users, athletes should retain full discretion on whether to use chatbots, alternative  
157 methods, or a combination of both. The psychologist highlighted the need to implement chatbots in a manner that  
158 avoids triggering anxiety or other negative emotions. All the comments are in alignment with the five ethical  
159 principles proposed by AI4People: beneficence, non-maleficence, justice, autonomy, and explicability<sup>24</sup>.

160 *Concluding question:* The moderator was prompted to steer the panel discussion towards its end with a final  
161 question. As anticipated, the questions were all forward-thinking. Panelists offered predictions drawing from their  
162 respective fields of expertise. Foreseeing rapid advancements in AI and complementary technologies, the panel  
163 envisaged a future of precision sports rehabilitation in the chatbots era. In this vision, the rehabilitation program  
164 would be tailored to individual needs, bolstered by healthcare providers, and empowered by chatbots. According to  
165 responses from the simulated athlete, this form of personalized support would make rehabilitation feel like a natural  
166 part of the recovery process and the athlete taking charge of the rehabilitation journey.

## 167 **Discussions**

168 The training data for ChatGPT spans nearly all disciplines, allowing it to role-play as an expert in response to  
169 specific inquiries. The interdisciplinary approach of PanelGPT brings several benefits. First, the responses come  
170 from panelists with complementary expertise, providing different perspectives that are automatically categorized.  
171 This aids in gaining a comprehensive view of the topic in question. For instance, including an athlete on the panel  
172 yielded a unique user perspective that could be overlooked in simple prompts, as demonstrated by the responses to  
173 "psychological support" (**Supplementary File 4**). Secondly, role-playing focuses the chatbot's attention on the  
174 question and provides important contexts in responding to the questions. When the "physical therapy" questions  
175 were simply prompted to ChatGPT, the responses quickly drifted towards other topics like education and mental  
176 health (**Supplementary File 5**). Finally, having a panel of experts enables audiences to form a balanced view on a  
177 specific topic. For example, in addressing the "physical therapy" questions, the physiologist's response highlighted  
178 the current limitations of chatbots in text or voice communication, while the AI expert expanded the discussion to  
179 the integration of real-time video analysis (**Supplementary Files 1 to 3**).

180 The breadth and depth of a response from a panelist depend on the training data set in the field. In several  
181 discussions, such as "patient education" and "tracking and other alternatives", where we expected feedbacks from all  
182 panelists, there was a noticeable lack of direct responses from the nutritionist. It could be that the data set used to

183 train ChatGPT for the nutritionist was under-representative in the rehabilitation field. Indeed, a combined search for  
184 'rehabilitation' (or 'rehab') and 'nutritionist' (or 'nutrition') on PubMed yielded 6-to-8 times fewer hits compared to  
185 searches involving 'physiotherapist' (or 'physiotherapy') or 'psychologist' (or 'psychology') (as of 07/07/2023). To  
186 address this limitation, the human operator could send reminders to the nutritionist to elicit a response. The AI  
187 expert responded to questions in all topics. This is expected for the inherent need of AI expertise in the creation of  
188 such chatbot systems.

189 The data used to train ChatGPT only extends up until September 2021. As such, it was unable to provide comments  
190 that would reference more recent developments in chatbots like ChatGPT itself or BARD. The feature to activate  
191 BING within ChatGPT does allow for real-time information browsing from the internet. However, in practice this  
192 disrupted the panel discussion's flow, resulting in a shift back to the regular ChatGPT conversation format and a  
193 subsequent loss of the expert identities after several exchanges (as shown in **Supplementary Files 6 to 8**).

194 We observed instances where the response to a question from the same expert was vague in one simulation but  
195 detailed in another. This suggests that conducting multiple simulations could enhance the efficacy of PanelGPT in  
196 providing a well-rounded understanding of the knowledge landscape surrounding an interdisciplinary topic. In fact,  
197 this practice enables self-consistency checking, which has been shown to improve reasoning performance of  
198 language models <sup>25</sup>, and highlights recurring themes related to the question. Additionally, summarizing diverse  
199 responses from the multiple simulations facilitates the identification of contrasting viewpoints and emergent trends  
200 in the panel discussion.

201 Hallucination, the generation of unsupported or false information, is a prevalent issue with LLM-based chatbots.  
202 The multi-perspective approach of PanelGPT allows the chatbot to draw on the strengths and mitigate the  
203 weaknesses of each panelist when responding to specific questions. The current model is constrained by the fact that  
204 the same chatbot simulates all the panelists. With advances in chatbot development, this model could be extended by  
205 integrating responses from other LLM-chatbots, especially those possessing domain-specific knowledge. In this  
206 context, cross-referencing responses from different experts on the panel powered by distinct models help mitigate  
207 hallucination <sup>26</sup>. Nonetheless, it remains crucial to cross-verify the conclusions drawn from the simulation with  
208 literature findings or opinions from human experts to ensure the accuracy of the information.

209 Throughout the simulation, we noted instances where comments from one expert were acknowledged by another.  
210 Intriguingly, contradictory comments between experts were not encountered. The richness and depth of the  
211 discussion can be further enhanced by utilizing additional prompting strategies. For instance, after each response  
212 round, panelists could be prompted to critically evaluate each other's comments to foster consensus or highlight  
213 disagreements. Panelists may also be prompted to pose questions to one another, such as seeking clarifications or  
214 requesting further details on a given response. Moreover, panelists could be allowed to prompt the audience to  
215 clarify their questions if necessary. These additional prompting tactics not only make the panel discussion more  
216 engaging but also mirror a real-life scenario, increasing the likelihood of obtaining a thorough appreciation of the  
217 topic.

218 In conclusion, we present PanelGPT, an innovative method that capitalizes the multi-role-playing feature of  
219 ChatGPT to explore the knowledge landscape of interdisciplinary topics through simulated panel discussions. By  
220 applying this model to chatbots in sports rehabilitation, we summarized the opportunities and challenges in this  
221 emerging field. As a generalizable model, it could serve as a supplementary tool in the classroom, aiding students in  
222 understanding complex interdisciplinary topics. Furthermore, it can be extended to clinical settings to assist  
223 healthcare providers in enhancing patient care that requires interdisciplinary interventions, such as sports  
224 rehabilitation, stroke rehabilitation, and the management of recurrent pneumonia in long-term care facilities.

## 225 **Competing Interests**

226 The Authors declare no Competing Financial or Non-Financial Interests

## 227 **Data availability**

228 Prompts and scripts from the simulations to support the conclusions are in Supplementary Files of the manuscript.

## 229 Author Contributions

230 Conceptualization: G.H.; Formal data analysis: all authors; Writing - Original Draft: G.H; Writing - Review &  
231 Editing: all authors.

## 232 Acknowledgements

233 NIH-NIGMS grants P20 GM103434, U54 GM-104942, and 1P20 GM121322 to GH; NSF 2125872 to GH and  
234 DAA; NIH-NLM grant No. R01LM013438 to LL; NIH-NLM grant 5R01LM013392 to DX. WVU Cancer Institute  
235 summer undergraduate research program to J.C.M. The content is solely the responsibility of the authors and does  
236 not necessarily represent the official views of the National Institutes of Health. The writing was polished by  
237 ChatGPT. We thank Zien Chen and Evelyn Shue from the lab for proof-reading.

## 238 References

- 239 1 PricewaterhouseCoopers. *PwC Outlook for the sports market in North America through 2023*,  
240 <<https://www.pwc.com/us/en/industries/tmt/assets/pwc-sports-outlook-2019.pdf>> (2019).
- 241 2 Sheu, Y., Chen, L. H. & Hedegaard, H. Sports- and Recreation-related Injury Episodes in the  
242 United States, 2011-2014. *Natl Health Stat Report*, 1-12 (2016).
- 243 3 Dhillon, H., Dhillon, S. & Dhillon, M. S. Current Concepts in Sports Injury Rehabilitation. *Indian J*  
244 *Orthop* **51**, 529-536, doi:10.4103/ortho.IJOrtho\_226\_17 (2017).
- 245 4 Ramkumar, P. N. *et al.* Sports Medicine and Artificial Intelligence: A Primer. *Am J Sports Med* **50**,  
246 1166-1174, doi:10.1177/03635465211008648 (2022).
- 247 5 Owens, B. How Nature readers are using ChatGPT. *Nature* **615**, 20-20, doi:10.1038/d41586-023-  
248 00500-8 (2023).
- 249 6 Anthony, C. A. *et al.* Acceptance and Commitment Therapy Delivered via a Mobile Phone  
250 Messaging Robot to Decrease Postoperative Opioid Use in Patients With Orthopedic Trauma:  
251 Randomized Controlled Trial. *J Med Internet Res* **22**, e17750, doi:10.2196/17750 (2020).
- 252 7 Bian, Y., Xiang, Y., Tong, B., Feng, B. & Weng, X. Artificial Intelligence-Assisted System in  
253 Postoperative Follow-up of Orthopedic Patients: Exploratory Quantitative and Qualitative Study. *J*  
254 *Med Internet Res* **22**, e16896, doi:10.2196/16896 (2020).
- 255 8 Dwyer, T. *et al.* Use of an Artificial Intelligence Conversational Agent (Chatbot) for Hip  
256 Arthroscopy Patients Following Surgery. *Arthrosc Sports Med Rehabil* **5**, e495-e505,  
257 doi:10.1016/j.asmr.2023.01.020 (2023).
- 258 9 Haque, M. D. R. & Rubya, S. An Overview of Chatbot-Based Mobile Mental Health Apps: Insights  
259 From App Description and User Reviews. *JMIR Mhealth Uhealth* **11**, e44838, doi:10.2196/44838  
260 (2023).
- 261 10 Shue, E. *et al.* Empowering Beginners in Bioinformatics with ChatGPT. *Quantitative Biology* **11**,  
262 105-108, doi:10.15302/J-QB-023-0327 (2023).
- 263 11 Cheng, K. *et al.* Exploring the Potential of GPT-4 in Biomedical Engineering: The Dawn of a New  
264 Era. *Ann Biomed Eng*, doi:10.1007/s10439-023-03221-1 (2023).
- 265 12 Host, K. & Ivasic-Kos, M. An overview of Human Action Recognition in sports based on Computer  
266 Vision. *Heliyon* **8**, e09633, doi:10.1016/j.heliyon.2022.e09633 (2022).
- 267 13 Oh, J., Jang, S., Kim, H. & Kim, J. J. Efficacy of mobile app-based interactive cognitive behavioral  
268 therapy using a chatbot for panic disorder. *Int J Med Inform* **140**, 104171,  
269 doi:10.1016/j.ijmedinf.2020.104171 (2020).
- 270 14 Chaix, B. *et al.* When Chatbots Meet Patients: One-Year Prospective Study of Conversations  
271 Between Patients With Breast Cancer and a Chatbot. *Jmir Cancer* **5**, doi:ARTN  
272 e1285610.2196/12856 (2019).
- 273 15 de Gennaro, M., Krumhuber, E. G. & Lucas, G. Effectiveness of an Empathic Chatbot in  
274 Combating Adverse Effects of Social Exclusion on Mood. *Front Psychol* **10**, 3061,  
275 doi:10.3389/fpsyg.2019.03061 (2019).
- 276 16 Abbasi, A., Li, J., Adjeroh, D., Abate, M. & Zheng, W. Don't Mention It? Analyzing User-  
277 Generated Content Signals for Early Adverse Event Warnings. *Information Systems Research*  
278 **30**, 1007-1028, doi:10.1287/isre.2019.0847 (2019).

279 17 Casas, J., Mugellini, E. & Abou Khaled, O. Food Diary Coaching Chatbot. *Proceedings of the*  
280 *2018 Acm International Joint Conference on Pervasive and Ubiquitous Computing and*  
281 *Proceedings of the 2018 Acm International Symposium on Wearable Computers*  
282 *(UbiComp/ISWC'18 Adjunct)*, 1676-1680, doi:10.1145/3267305.3274191 (2018).

283 18 Calvaresi, D., Eggenschwiler, S., Calbimonte, J. P., Manzo, G. & Schumacher, M. A personalized  
284 agent-based chatbot for nutritional coaching. *2021 IEEE/WIC/Acm International Conference on*  
285 *Web Intelligence and Intelligent Agent Technology (WI-IAT 2021)*, 682-687,  
286 doi:10.1145/3486622.3493992 (2021).

287 19 Han, R., Todd, A., Wardak, S., Partridge, S. R. & Raeside, R. Feasibility and Acceptability of  
288 Chatbots for Nutrition and Physical Activity Health Promotion Among Adolescents: Systematic  
289 Scoping Review With Adolescent Consultation. *JMIR Hum Factors* **10**, e43227,  
290 doi:10.2196/43227 (2023).

291 20 Niszczota, P. & Rybicka, I. The credibility of dietary advice formulated by ChatGPT: Robo-diets  
292 for people with food allergies. *Nutrition* **112**, 112076, doi:10.1016/j.nut.2023.112076 (2023).

293 21 Tolentino, D. *National Eating Disorders Association pulls chatbot after users say it gave harmful*  
294 *dieting tips*, <<https://www.nbcnews.com/tech/neda-pulls-chatbot-eating-advice-rcna87231>>  
295 (2023).

296 22 Cheng, K. M. *et al.* Artificial Intelligence in Sports Medicine: Could GPT-4 Make Human Doctors  
297 Obsolete? *Ann Biomed Eng*, doi:10.1007/s10439-023-03213-1 (2023).

298 23 Castelvechi, D. Open-source AI chatbots are booming - what does this mean for researchers?  
299 *Nature* **618**, 891-892, doi:10.1038/d41586-023-01970-6 (2023).

300 24 Floridi, L. *et al.* AI4People-An Ethical Framework for a Good AI Society: Opportunities, Risks,  
301 Principles, and Recommendations. *Mind Mach* **28**, 689-707, doi:10.1007/s11023-018-9482-5  
302 (2018).

303 25 Wang, X. *et al.* Self-Consistency Improves Chain of Thought Reasoning in Language Models.  
304 *arXiv*, doi:10.48550/arXiv.2203.11171 (2023).

305 26 Jiang, D., Ren, X. & Lin, B. Y. LLM-Blender: Ensembling Large Language Models with Pairwise  
306 Ranking and Generative Fusion. *arXiv*, doi:10.48550/arXiv.2306.02561 (2023).

307

308 **Figure Legends**

309 **Figure 1: An overview of the PanelGPT model for a ChatGPT-simulated panel discussion (A), and a flow**  
310 **chart that delineates the process of the simulation (B).**

311 **Table 1. Questions designed for the simulated panel discussion on “chatbots in sports rehabilitation”.**

| Category                        | Questions                                                                                                                                                                                                                                                                                                                                                                                                                                                                         | Source                                                                                            |
|---------------------------------|-----------------------------------------------------------------------------------------------------------------------------------------------------------------------------------------------------------------------------------------------------------------------------------------------------------------------------------------------------------------------------------------------------------------------------------------------------------------------------------|---------------------------------------------------------------------------------------------------|
| Opening Question                | What role do you see chatbots playing in sports rehabilitation currently? And how do you see this role evolving in the future?                                                                                                                                                                                                                                                                                                                                                    | Directly from ChatGPT-4                                                                           |
| Patient Education               | What education should we offer to guide our athlete the use of a chatbot for rehab?                                                                                                                                                                                                                                                                                                                                                                                               | From authors, but inspired from pilot simulations with ChatGPT-4                                  |
| Physical Therapy                | How can chatbots help in an athlete's recovery? Can they really understand things like how the athlete moves, or how they distribute their weight, and then give specific advice about exercises that are just right for them?                                                                                                                                                                                                                                                    | From authors, inspired from Cheng, et al. <sup>11</sup> ; polished by ChatGPT-4 into oral English |
| Psychological Support           | How are chatbots improving the psychological health of injured athletes? Can they really pick up on the emotional tone in our words and adjust their responses to suit our mood?                                                                                                                                                                                                                                                                                                  | From authors, inspired from Oh, et al. <sup>13</sup> ; polished by ChatGPT-4 into oral English    |
| Nutrition                       | How can chatbots improve in nutrition management for athletes during recovery?                                                                                                                                                                                                                                                                                                                                                                                                    | From authors, but inspired from pilot simulations with ChatGPT-4                                  |
| Tracking and Other Alternatives | How do chatbots keep track of an athlete's recovery? And do they have any special advantages over the old ways we used to do this?                                                                                                                                                                                                                                                                                                                                                | From authors, inspired from Dwyer, et al. <sup>8</sup> ; polished by ChatGPT-4 into oral English  |
| Ethics                          | When we bring chatbots into athlete recovery, how do we make sure we respect patient choice, keep data private and safe? How do we handle worries about things like bias, fairness, and not undervaluing the human touch in our clinics?                                                                                                                                                                                                                                          | From authors, <i>ad hoc</i> ; polished by ChatGPT-4 into oral English                             |
| Concluding Question             | 1: Given the rapidly evolving capabilities of AI and chatbots, where do you see the future of chatbots in sports rehabilitation, say in the next 5 to 10 years?<br>2: As we look forward to the future, what is one exciting opportunity or development that you hope to see in the use of chatbots in sports rehabilitation?<br>3: What do you each believe is the most exciting opportunity or development for the use of chatbots in sports rehabilitation in the near future? | Directly from ChatGPT-4                                                                           |

312



313 **Table 2. Prompts used to steer the simulated panel discussion.**

|                                                                                                                                                                                                                                                                                                                                                                                                                                                                                                                                                                                                                                                                                                                                                                                                                                                                                                                                                                                                                                                       |
|-------------------------------------------------------------------------------------------------------------------------------------------------------------------------------------------------------------------------------------------------------------------------------------------------------------------------------------------------------------------------------------------------------------------------------------------------------------------------------------------------------------------------------------------------------------------------------------------------------------------------------------------------------------------------------------------------------------------------------------------------------------------------------------------------------------------------------------------------------------------------------------------------------------------------------------------------------------------------------------------------------------------------------------------------------|
| Introductory prompts*                                                                                                                                                                                                                                                                                                                                                                                                                                                                                                                                                                                                                                                                                                                                                                                                                                                                                                                                                                                                                                 |
| <ul style="list-style-type: none"><li>○ You will assume various roles in a thought-provoking panel on "Chatbots in Sports Rehabilitation: Opportunities and Challenges." The simulation will involve a skilled moderator, Henry, who will guide the discussion, along with esteemed professionals in their respective fields: Dr. Mandy, a sports physiotherapist; Dr. Perry, a sports psychologist; Nikki a sports nutritionist; Allan, a professional athlete who had successfully navigated the rehabilitation process after a severe injury; and Nelson, an expert in Natural Language Processing for clinical application. I will role-play the audience and send you questions or reminders. While multiple experts can offer their insights, no question should be left unanswered. When replying to a question, please use spoken English. Henry, please begin the panel discussion by introducing the panel, followed by asking the panel about the role of chatbots in sports rehabilitation and how they see this role evolving.</li></ul> |
| Inquiry prompts                                                                                                                                                                                                                                                                                                                                                                                                                                                                                                                                                                                                                                                                                                                                                                                                                                                                                                                                                                                                                                       |
| <ul style="list-style-type: none"><li>○ The same as the "Questions" column in <b>Table 1</b>.</li></ul>                                                                                                                                                                                                                                                                                                                                                                                                                                                                                                                                                                                                                                                                                                                                                                                                                                                                                                                                               |
| Other prompts                                                                                                                                                                                                                                                                                                                                                                                                                                                                                                                                                                                                                                                                                                                                                                                                                                                                                                                                                                                                                                         |
| <ul style="list-style-type: none"><li>○ Henry, would you summarize and open the floor for questions?</li><li>○ Henry, would you summarize the response and move to solicit the next question?</li><li>○ Experts on the panel, please provide comments on the question.</li><li>○ Henry, would you summarize the response? After that, because the time is up, please think of one last question to ask the panel to conclude the discussion.</li><li>○ Henry, please conclude the panel discussion and ask the audience for another round of applause to thank the panel.</li></ul>                                                                                                                                                                                                                                                                                                                                                                                                                                                                   |

314 \*To integrate BING search into the simulation, activate BING in the ChatGPT settings. Subsequently, add the  
315 sentence, "A BING search may be performed in order to answer each of the questions with the most up to date  
316 information" after the statement, "While multiple experts can offer their insights, no question should be left  
317 unanswered." We observed that use of the BING feature frequently disrupted the panel discussion's flow, causing it  
318 to revert to a regular ChatGPT conversation (see discussion).

319 **Table 3: Records on direct responses to questions during the simulation.**

|                                 | Physiotherapist | Psychologist | Nutritionist | Athlete | AI expert |
|---------------------------------|-----------------|--------------|--------------|---------|-----------|
| Opening Question                | 1, 2, 3         | 1, 2, 3      | 1, 2, 3      | 1, 2, 3 | 1, 2, 3   |
| Patient Education               | 1, 2, 3         | 1, 2, -      | -, -, -      | 1, -, 3 | 1, 2, 3   |
| Physical Therapy                | 1, 2, 3         | -, -, -      | -, -, -      | -, -, - | 1, 2, 3   |
| Psychological Support           | -, -, -         | 1, 2, 3      | -, -, -      | 1, -, - | 1, 2, 3   |
| Nutrition                       | -, -, -         | -, -, -      | 1, 2, 3      | -, -, - | 1, 2, 3   |
| Tracking and Other Alternatives | 1, 2, 3         | 1, 2, -      | -, -, -      | 1, 2, - | 1, 2, 3   |
| Ethics                          | 1, 2, 3         | 1, 2, -      | 1, 2, -      | 1, -, - | 1, 2, 3   |
| Concluding Question             | 1, 2, 3         | 1, 2, 3      | 1, 2, 3      | 1, 2, 3 | 1, 2, 3   |

320 Round numbers (1, 2, and 3) indicate when a response directly targeting the question was made, while a "-" denotes  
 321 the absence of such a response.

322 **Supplementary File Legends**

323 **Supplementary File 1:** Prompts and scripts for the 1<sup>st</sup> round of simulation.

324 **Supplementary File 2:** Prompts and scripts for the 2<sup>nd</sup> round of simulation.

325 **Supplementary File 3:** Prompts and scripts for the 3<sup>rd</sup> round of simulation.

326 **Supplementary File 4:** Scripts for a direct prompt on "psychological support."

327 **Supplementary File 5:** Scripts for a direct prompt on "physical therapy."

328 **Supplementary File 6:** Prompts and scripts for the 1<sup>st</sup> round of simulation with BING activated.

329 **Supplementary File 7:** Prompts and scripts for the 2<sup>nd</sup> round of simulation with BING activated.

330 **Supplementary File 8:** Prompts and scripts for the 3<sup>rd</sup> round of simulation with BING activated.

**Figure 1**

**A**

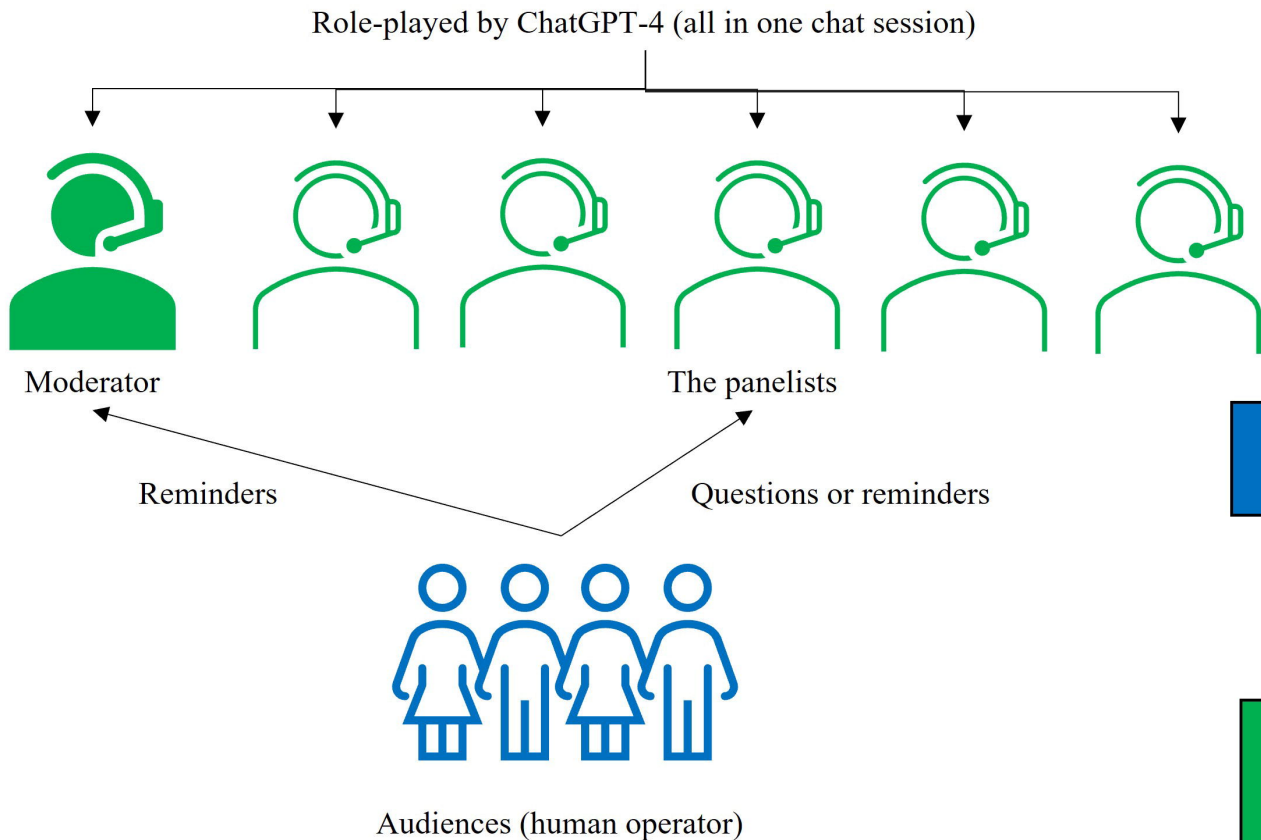

**B**

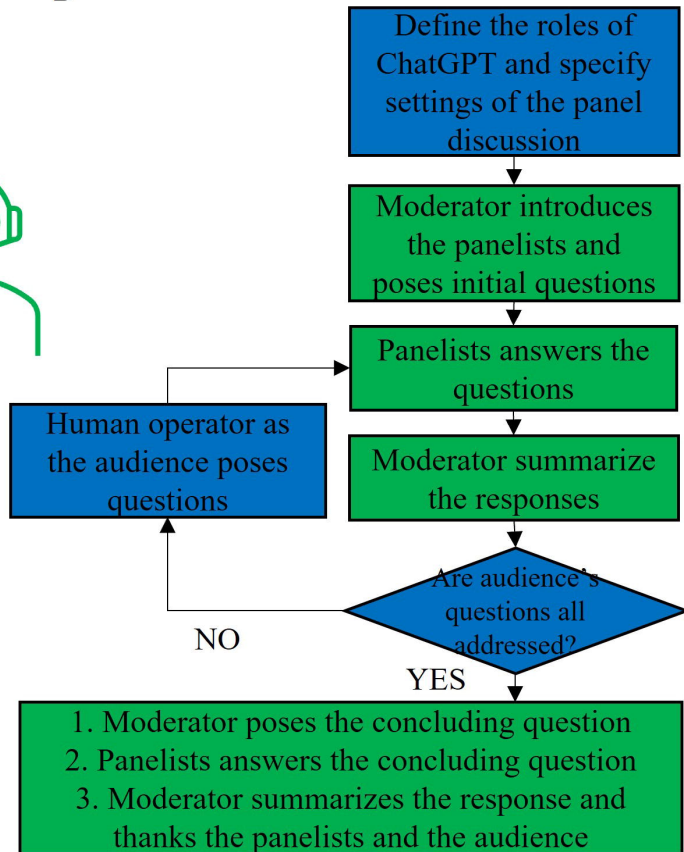

Source: https://www.medrxiv.org/content/10.1101/2023.07.23.23292452v1.full.pdf
